1 Fast near-whole brain imaging in adult  
2 *Drosophila* during responses to stimuli and  
3 behavior

4  
5 Sophie Aimon<sup>1\*</sup>, Takeo Katsuki<sup>1</sup>, Tongqiu Jia<sup>5</sup>, Logan Grosenick<sup>2</sup>, Michael Broxton<sup>2</sup>, Karl Deisseroth<sup>3,4</sup>,  
6 Terrence J. Sejnowski<sup>5,6</sup>, Ralph J. Greenspan<sup>1,6,7</sup>

7  
8 <sup>1</sup> Kavli Institute for Brain and Mind, UCSD, La Jolla, CA, USA

9 <sup>2</sup> Departments of Computer Science and Bioengineering, Stanford University, Stanford, CA, USA

10 <sup>3</sup> Departments of Bioengineering and Psychiatry, Stanford University, Stanford, CA, USA

11 <sup>4</sup> Howard Hughes Medical Institute, Stanford University, Stanford, CA, USA

12 <sup>5</sup> Howard Hughes Medical Institute, Computational Neurobiology Laboratory, Salk Institute for Biological  
13 Studies, La Jolla, CA, USA

14 <sup>6</sup> Division of Biological Sciences, University of California San Diego, La Jolla, CA, USA

15 <sup>7</sup> Department of Cognitive Science, University of California, San Diego, La Jolla, CA, USA

16 \*Corresponding author: [aimon.sophie@gmail.com](mailto:aimon.sophie@gmail.com)

17

## 18 Abstract

19 Whole brain recordings give us a global perspective of the brain in action. In this study, we describe a  
20 method using light field microscopy to record near-whole brain calcium and voltage activity, at high  
21 speed, in behaving adult flies. We first obtained global activity maps for various stimuli and behaviors.  
22 Notably, we found that brain activity increased on a global scale when the fly walked but not when it  
23 groomed. This global increase with walking was particularly strong in dopamine neurons. Second, we  
24 extracted maps of spatially distinct sources of activity as well as their time series using principal  
25 component analysis and independent component analysis. The characteristic shapes in the maps  
26 matched the anatomy of sub-neuropil regions and in some cases a specific neuron type. Brain structures  
27 that responded to light and odor were consistent with previous reports, confirming the new technique's  
28 validity. We also observed previously uncharacterized behavior-related activity, as well as patterns of  
29 spontaneous voltage activity.

30

31

## 32 Introduction

33 Measuring activity at the scale of the whole brain is critical to understanding how different brain regions  
34 interact to process and control sensory inputs, internal states, and behavior. Whole-brain recordings not  
35 only reveal which regions are involved in which functions and with what dynamics, but also help  
36 interpret the effects of a targeted intervention (e.g. a lesion or local alteration with optogenetics) on the  
37 whole network, and give context to local electrophysiology recordings. However, techniques for imaging  
38 a whole brain so far have been orders of magnitude slower than neuronal electrical activity. In fact,  
39 recent reports of volumetric whole brain fluorescence imaging in Zebrafish and Drosophila larvae had a  
40 frame rate of 12 Hz [1] and 5 Hz [2], respectively. By contrast, light field microscopy [3–9], makes it  
41 possible to image large volumes of scattering brain tissue at more than 100 Hz.

42 In this study, we leverage this technique to record large-scale activity in the brain of behaving adult fruit  
43 flies. We present a method to optically access the fly's brain while enabling it to retain the ability to walk  
44 or groom. We show that the near-whole brain can be imaged with a 20x objective at a frame rate up to  
45 200 Hz and fluorescence recorded from pan-neuronally expressed calcium (GCaMP6 [10]) or voltage  
46 (ArcLight [11]) probes. We present rich datasets of near-whole brain activity and behavior, as well as  
47 two analysis methods. First, we map activity for specific stimuli and behaviors with short time-scales; for  
48 example, we compared activity when the fly rested, walked, and groomed. Second, we apply a  
49 computational method (principal component analysis, or PCA, followed by independent component  
50 analysis, or ICA) to extract components representing spatially distinct sources of activity [6,12,13]. We  
51 show that these sources correspond to sub-neuropil areas or processes from small populations of  
52 neurons that are anatomically well characterized, and we compare their responses to flashes of light or  
53 odor puffs with those in literature reports of experiments done on restricted regions. Additionally, by

54 using this method, we discovered neuronal projections whose activity correlated with turning, as well as  
55 previously unreported patterns of spontaneous voltage activity.

56

## 57 Results

### 58 **Imaging the near-whole brain of behaving adult *Drosophila***

59 We first fixed a fly's head by rotating it 45 degrees or more around the transversal axis to decrease the  
60 depth of the volume imaged and to improve access to the brain. We then exposed the brain while  
61 keeping the eyes, antennae, and legs intact and clean (see methods section and Fig. S1). A ball was  
62 placed under the fly's tarsi so that it could typically rest, walk, and groom. We imaged the fly brain's  
63 fluorescence using light field microscopy. As shown in Fig 1A, we modified an upright epifluorescence  
64 microscope (equipped with a 20x 1.0 NA or a 40 x 0.8 NA objective) by adding a microlens array at the  
65 image plane of the objective and placing the camera sensor at the image plane of the microlens array  
66 through relay lenses. We recorded light field images continuously with a high-speed sCMOS camera up  
67 to 100 Hz for GCaMP6 and 200 Hz for ArcLight (using the middle of the camera sensor).

68 We then reconstructed the volumes—typically  $600 \times 300 \times 200 \mu\text{m}^3$  to encompass the whole brain (Fig.  
69 1B)—using the volumetric deconvolution method for light field microscopy described in ref. [3]. Note  
70 that unlike other microscopy techniques that are based on scanning (e.g. two-photon, confocal or light  
71 sheet microscopy), excitation light illuminates the entire brain all the time, and all the photons emitted  
72 in the numerical aperture of the objective are used to reconstruct the image (minus a ~40% loss through  
73 the objective, tube lens, micro-lens array and relay lenses). This maximizes the number of photons  
74 collected (and thus information about brain activity) per unit of volume and time.

75 We used 2  $\mu\text{m}$  fluorescent beads embedded in a gel to measure the point spread function, and found  
76 that it widens with distance from the focal plane, varying from 3.5 to 12  $\mu\text{m}$  laterally and from 6 to 35  
77  $\mu\text{m}$  axially for 20x 1.0 NA objective, and varying from 2 to 7  $\mu\text{m}$  laterally and from 4 to 22  $\mu\text{m}$  axially for  
78 40x 0.8 NA objective (Fig. S2 and theoretical expression in [3]). As shown in Fig. S3 (presenting ArcLight's  
79 baseline fluorescence) and below, this resolution was sufficient to recognize neuropil structures and  
80 extract activity from sub-neuropil compartments.

### 81 **Global activity during response to stimuli and behavior**

82 Movies 1 and 2, present maximum z projections of near-whole brain activity (after preprocessing as  
83 described in Fig. S4 and the Methods section), when stimuli were presented to the fly. Figs. 2C and Fig  
84 S5C show maps of the response to stimuli. We found strong increases in activity at the onset of puffs of  
85 odor and flashes of UV light in specific parts of the brain (see Figs. S5, S6, and S7), in accordance with  
86 previous reports in the literature: the strongest responses to light involved mostly the optic lobes,  
87 optical glomeruli, and posterior slope, and the responses to odor involved the antennal lobe and most of  
88 the dorsal neuropils including the lateral horn, superior neuropils and the mushroom body (Fig. S5C, S6  
89 and S7). The global map of the response to stimuli was similar for calcium (GCaMP6) and voltage  
90 (ArcLight) activity (Fig. S5C).

91 We also examined near-whole brain activity in the absence of external stimuli (i. e., spontaneous  
92 behavior), which consisted of walking, grooming, and resting (see Movies 3-7). Most strikingly, the brain  
93 was more active on a global scale when the fly walked than when it rested or groomed (see Movie 3,  
94 Figs. 2A, S5A, and S8). To verify that this response was linked to walking rather than the optic flow from  
95 the ball, we repeated the experiment with a blind *norpA* mutant fly, and again found a global increase  
96 during walking in comparison with rest (see Movie 4 and Fig. S5A). In contrast, we found only local  
97 activation in the region of the saddle, wedge and antennal mechanosensory and motor center (in 4 out

98 of 5 flies) during grooming. To investigate whether this global increase was coming exclusively from  
99 neurons expressing one type of neurotransmitter or neuromodulator, we performed the same  
100 experiments with more restricted lines. We also found a global increase when GCaMP6f was expressed  
101 in cholinergic neurons (the majority of excitatory neurons in the fly brain) (Movie 5 and Fig S5A). When  
102 GCaMP6f was expressed in dopamine neurons only (Movie 6, Fig 2A and Fig S5A), we observed a strong  
103 large-scale increase of activity tightly locked with walking. Surprisingly little activity during resting or  
104 grooming, apart from the mushroom body compartments. We observed more activity unrelated to  
105 behavior in flies expressing GCaMP6f in both dopamine and serotonin neurons (Movie 7).

106 Figs. 2B and FigS5B show the difference in activity when the fly turned left compared to right. Although  
107 there was a strong variability from fly to fly that will need to be characterized in future studies, we  
108 observed antisymmetric patterns in the ventral areas and in the lateral superior protocerebrum (as  
109 indicated by the arrows) in all flies.

#### 110 **Source extraction algorithm reveals functional maps at the sub-neuropil level**

111 We used a combination of statistical methods to extract maps and time series of spatially distinct  
112 sources of activity (see Methods section for details). Briefly, we first applied PCA (using singular value  
113 decomposition) to find maps of correlated activity and to reduce dimensionality. We then applied ICA to  
114 the PCA maps to find sparse functional regions (see analysis pipeline in Fig. S4). Fig. 3 shows z-stacks  
115 containing all components ( $z\text{-score} > 3$ ) from pan-neuronal GCaMP6 recordings (see also additional flies  
116 in Figs. S9 and S10). We also performed the same analysis with flies that pan-neuronally expressed  
117 activity-independent GFP to help identify artifact-related components—movement, aliasing, or noise as  
118 shown in Fig. S11.

119 Even though PCA and ICA are mathematical algorithms that make minimal assumptions about the brain,  
120 most functional maps matched well with the anatomical structures. We aligned the brain with an

121 anatomical template [14] using landmarks registration to automatically sort the components by brain  
122 region (Fig. 4A). In Fig. 4B, the left column presents the component's thresholded maps, whereas the  
123 right column presents central complex structures from (ref [15]) or neuronal processes from (ref. [16])  
124 assembled using Virtual Fly Brain [17]. Several sub-neuropil regions are recognizable from the shape of  
125 the maps (e.g., protocerebral bridge glomeruli, ellipsoid body rings and fan-shaped body layers).

126 For some components, parts of a specific neuron type were identifiable from the combination of sub-  
127 neuropil regions present in the map. For example, z-scored maps containing signals in one antennal lobe  
128 glomerulus, in the calyx, and in the lateral horn, likely resulted from the activity of one type of antennal  
129 lobe projection neurons. Likewise, z-scored maps with signals spanning both the horizontal and vertical  
130 mushroom body lobes likely resulted from activity in alpha-beta or alpha'-beta' Kenyon cell axons,  
131 whereas maps with signal in the horizontal lobe only likely resulted from activity in the gamma Kenyon  
132 cell axons. The maps of the components matching the protocerebral bridge glomeruli also often  
133 contained radial parts of the ellipsoid body (e.g., Fig.4B, left column top panel), suggesting that these  
134 components might originate from tile or wedge neurons [15,18].

135 **Extracted sources' time series retrieve known physiology in response to stimuli, and reveal projections**  
136 **involved in turning left or right during walking**

137 The component's time series (resulting from PCA/ICA or from ROI  $\Delta F/F$  averages: Fig. S12 and S14 to  
138 S16) were consistent with previous reports of activity from the brain structures identified in the  
139 components' maps. Most of the components responding to the onset and/or offset of light were in the  
140 optic lobe [19] (Figs. S13 and S14). In contrast, components responding to puffs of odors were mostly in  
141 the antennal lobe, the lateral horn, and the mushroom body [20] (Figs. S12 and S15). Components likely  
142 representing the activity of antennal projection neurons were spontaneously active in the absence of

143 odor, but their activity strongly increased with the odor (Fig S15 panel A), consistent with the literature  
144 [21].

145 In addition, regions in the lateral protocerebrum, the superior slope, the AMMC (antennal  
146 mechanosensory and motor center), the saddle, and the protocerebral bridge were strongly active when  
147 the fly walked (Fig. S16). This is consistent with previous anatomical studies; the projection from the  
148 descending neurons are most dense in the posterior slope, ventrolateral protocerebrum, and the AMMC  
149 [22]. Some of these walking-related components were strongly correlated with turning left or right (Fig.  
150 5). We found the same components when using a *Cha-Gal4* driver instead of a pan-neuronal driver (see  
151 Fig. S17), which suggests that all those neurons are cholinergic. Their strong structural characteristics  
152 (e.g., small neuropil areas forming an inverted “V” shape, fine tracts) will help identify candidate drivers  
153 and neurons in anatomy databases in follow up studies. Note that these components are mostly present  
154 in the posterior slope, as are neurons involved in turning during flight [23].

#### 155 **Restricted drivers’ functional maps match single neuron’s anatomy**

156 Figs. 6 and S18 show components obtained when using more restrictive drivers for dopamine neurons:  
157 *TH-Gal4* (data are the same as in Movie 6). As before, we sorted the components’ traces and maps by  
158 brain regions (Fig. 6A). In agreement with our observation from Movie 6, most components were tightly  
159 correlated with the fly walking (forest green traces interleaved with the components’ traces). Fig. 6B  
160 reproduces some of the maps in Fig. 6A, along with anatomical maps of single dopaminergic neurons  
161 from the Virtual Fly Brain database [17]. Some maps had unequivocal anatomical counterparts. For  
162 example, the first two maps matched well with the anatomy of processes from dopaminergic PPL1  
163 neurons innervating mushroom body alpha lobe compartments, each component thus corresponding to  
164 only one or two cells per hemisphere [24].

#### 165 **Components from pan-neuronal voltage recordings**



166 As Figs. 7 and S19 demonstrate, voltage recordings with ArcLight also gave rise to maps portraying  
167 specific neuropils (and clearly distinguishable from artefacts as shown in Fig. S20). As Fig. S21 shows, the  
168 number of components per brain region was typically smaller than it was for GCaMP6—we extracted an  
169 average 174 (std=68, N=12) activity-related components (i.e., not noise or movement artefacts as  
170 detailed in the Methods section) from GCaMP6 recordings and 54 (std=14, N=6) from ArcLight  
171 recordings, probably because of the probe's lower signal-to-noise ratio. However, ArcLight components  
172 were similar to those found with GCaMP6: in the optic lobe, some components responded to the onset  
173 and/or offset of light, with various degrees of adaptation. In the posterior slope, we found peaks at the  
174 onset of light. We also recorded large peaks of activity in the ventrolateral protocerebrum. Finally, we  
175 found components in the antennal lobe, lateral horn and mushroom body responded to odor (Fig. S22).  
176 The clearest difference between voltage and calcium was the presence in the ArcLight data of slow,  
177 spontaneous switches between the up and down levels of activity for components in a nodulus and  
178 contralateral protocerebral bridge (Fig 8). We did not observe those components in controls where GFP  
179 was expressed pan-neuronally. Furthermore, although some movements artefacts can generate slow  
180 fluctuations in those regions (see Fig 8B), we observed only the opposing or asynchronous switches for  
181 opposite sides of the brain when using ArcLight. Other patterns of spontaneous activity included slow  
182 oscillations in the antennal lobe and lateral horn, and fast, ongoing activity in the ellipsoid body rings  
183 and the protocerebral bridge (see Fig. S23 for an experiment in which many time scales of spontaneous  
184 activity were detected). More work is necessary to establish the conditions and consistency of these  
185 patterns of activity.

186 Note that time series from single trials had high enough signal-to-noise ratios to detect graded  
187 potentials (e.g., components in the optic lobe in response to the onset and/or offset of flashes of light),  
188 and spike-like signals (e.g. spontaneous activity and odor response for components in the antennal lobe,  
189 mushroom body and lateral horn (Fig. 7 and Fig. S22)), which is consistent with previous literature [20]

190 [19]. Spike-like signals were particularly clear in a more restricted driver for dopamine and serotonin  
191 neurons (i.e. TH-Gal4 and DDC-Gal4), as Fig S24 shows.

## 192 **Comparison of light field imaging to other techniques for adult *Drosophila* large-scale imaging**

193 Recent studies have shown that large-scale brain imaging in flies is possible with other imaging methods.  
194 Mann et al. [25] used a high-speed, two-photon microscope to image the brain with higher resolution  
195 but at a slower rate (1Hz) in the absence of stimuli or behavior. We applied our analysis pipeline to  
196 these data to compare it to the results from the light field microscope (see Fig. S25). Out of the 23  
197 activity-related components we obtained (compared to the average of 174 for light-field (see above),  
198 eight could be interpreted as cell bodies that could not be extracted at this resolution from the light-  
199 field data. Other components—components covering the antennal lobe, mushroom body, and lateral  
200 horn; components in the pars intercerebralis; and components in the antennal lobe glomerulus, calyx,  
201 and lateral horn (likely representing activity from antennal lobe projections neurons)—had similar  
202 spatial distribution as component from the light-field data.

203 Faster techniques have also been used to image large scale activity in flies: [26] used a Bessel beam to  
204 image 25% of the brain at 3.6Hz, and [27] used a light sheet approach (SCAPE, or swept confocally  
205 aligned planar excitation) to image a large portion of the brain at 10Hz. To test whether the fast frame  
206 rate of the light-field method enabled detecting signals otherwise undetectable with slower imaging  
207 methods, we subtracted the data smoothed over 100ms, thus revealing only the activity above 10 Hz. All  
208 GCaMP6f datasets (N=7) maintained activity related components (e.g., Fig. S26). When we did the same  
209 analysis with ArcLight data, four out of seven flies had at least one activity-related component. Note that  
210 more information from fast activity could be present in the data, but the low signal-to-noise ratio makes  
211 it difficult to detect it with PCA/ICA.

## 212 **Discussion**

213 In this article, we presented a method to record fast near-whole brain activity in behaving flies, offered  
214 unique datasets that the method produced, and provided two examples of analysis pipelines that  
215 highlight this technique's advantages.

216 First, we showed that the technique helps characterize global state changes related to response to  
217 stimuli and behavior. In particular, when looking at global activity in response to stimuli from different  
218 modalities, we obtained activity increases in brain regions known to be involved in processing these  
219 stimuli. Furthermore, we found a global pattern of activation when the fly walked in comparison to  
220 when it rested. In contrast, the activation was highly localized (in the areas of the AMMC, wedge, and  
221 saddle) when it groomed. This is consistent with a recent large scale optogenetic study that reported  
222 that the manipulation of many regions throughout the brain altered walking, but only a small region—  
223 the saddle—altered grooming [28]. The global activation during walking could be mediated by  
224 neuromodulators, and we indeed found that most dopamine neurons were silent during resting or  
225 grooming, but that many of these neurons, distributed over the whole brain, were active during walking.  
226 Dopamine activity could affect processing of underlying circuits (e.g., changing gain[29]), but could also  
227 be important for operant learning.

228 Second, we used a blind source separation algorithm to extract spatially distinct sources of activity.  
229 These sources matched anatomical sub-neuropil regions and thus helped identify neuron classes and  
230 sometimes a specific neuron type involved in the processing of specific stimuli or behavior, but also  
231 detected areas that were spontaneously active in the absence of changing stimuli and behavior. For  
232 example, we extracted activity in a nodulus and opposite side of the protocerebral bridge that switched  
233 between up and down states of activity. Although the fly was not walking in some of these experiments,  
234 the maps were similar to the pattern of expression of genetic drivers known to be involved in the fly's  
235 handedness [30]. The time series resembled the flip flop pattern that was measured in the moth with  
236 intracellular recordings from neurons in the lateral accessory lobe [31], which is directly connected with

237 the protocerebral bridge [15]. Note that the ability to record membrane voltage signals in the actual  
238 neuronal processes [32–34] performing the computation is an advantage over patch clamp experiments,  
239 which can only be recorded from the cell body at the periphery of the brain in *Drosophila* and thus may  
240 not be representative of the activity in the neuronal processes [35].

241 The datasets (available on CNCRS.org) of near-whole brain imaging and behavior contain additional,  
242 unexplored patterns of activity. Other analysis techniques will be necessary to extract all meaningful  
243 information.

244 The current method has several limitations that would benefit from being addressed in future work.

#### 245 **Temporal resolution**

246 The method permits imaging of the near-whole brain with a frame rate of 200 Hz; however, the time  
247 response of the probes we used in this study is slower (rise time to spike peak of ~0.15 seconds for  
248 GCaMP6f and ~0.1 seconds for ArLight in our hands). Fast activity (i.e., at the onset of stimulus  
249 response or components with activity above 10Hz in Fig S24) can still be detected, but the probe's  
250 response imposes a temporal filter on the underlying activity. The ability to record high signal-to-noise  
251 transients with such a high frame rate suggests that the light field microscope will be suited to measure  
252 activity from faster probes. This will help bridge the gap between the current fast local methods using  
253 microelectrodes (e.g., recording spikes and fast oscillations), and slower large-scale methods, such as  
254 calcium imaging.

#### 255 **Effect of the excitation light**

256 The excitation light excites the eye photoreceptors, thus affecting the fly's ability to see, as well as  
257 potentially changing brain activity states. In the future, the fly's blue light receptors could be genetically  
258 removed and potentially be replaced by another receptor, such as one for UV light, if a future researcher

259 wanted to study brain responses to visual inputs without the strong background activation from the  
260 excitation light. For applications that do not necessitate visual inputs, blind fly mutants (e.g., a  
261 *norpA*; cryptochrome mutant) could be used to affect all light detection in the brain. Finally, one of the  
262 recently developed red probes could be used instead of GFP-based probes. Note that besides activation  
263 at the onset of excitation light, we observed two types of artifacts when the eyes were not completely  
264 protected from the excitation light. First, we observed sudden discharges in medulla column projections  
265 to the lobulla layers (see Fig. 7, second and third traces). Second, we observed oscillating waves  
266 propagating onto the medulla and along the lobulla in some calcium recordings instances.

### 267 **Effect of the preparation on the state of the fly**

268 Dissection could have affected the fly's state. Removing the cuticle on the back of the brain could affect  
269 brain activity by activating nociceptor neurons (e.g., those in the bristles). Dissection could also have  
270 affected the fly's global health state. Indeed, we found that flies expressing *ArLight* pan-neuronally  
271 were usually less active after dissection than they were before. Finding the optimal recovery time after  
272 dissection could help minimize these effects. Imaging non-dissected flies genetically modified to have a  
273 cuticle with low absorbance (e.g. yellow flies) could also help characterize the effects of the dissection.

274 Although the fly could still move its legs, abdomen, and (to a limited extent) its wings, the  
275 immobilization of its head, proboscis, and thorax could have affected brain activity and behavior by  
276 imposing unnatural constraints. Furthermore, the fly's head was tilted more than 45 degrees in  
277 comparison to its natural position, in order to better align the thinner part of the brain to the z-axis. This  
278 helped minimize the loss of resolution with depth. We observed a seemingly natural behavior in this  
279 configuration (with alternations between grooming and walking as free flies do); however, we  
280 sometimes found the fly displaying unnatural behaviors, such as pushing the ball away or touching the  
281 holder with its legs.

282 Another problem resulting from immobilizing the fly's head was the lack of coupling between the stimuli  
283 position and the fly's movement that would normally occur in a natural setting. This problem can be  
284 solved using a virtual reality set-up in a closed loop configuration (e.g., using the movements of the ball  
285 for example to change the stimuli position).

### 286 **Data production rate**

287 The whole procedure made it impractical to obtain data from a large number of flies. Even with practice,  
288 fly preparation remained challenging to the extent that it was difficult to obtain more than one good  
289 preparation per day. Another factor limiting data production was the reconstruction step, which takes  
290 approximately 10h on a cluster of 16 GPUs for a dataset of 60GB (which corresponds to approximately 1  
291 minute of recording at 200Hz). This method is thus suited for studying complex spatiotemporal patterns  
292 and identifying neurons and brain structures in a few trials and flies, but not for larger studies such as  
293 genetic screens. Detecting sources from the raw light field data could help reduce the cost of  
294 reconstruction. For example, anatomical maps could be transformed back to a light field image and used  
295 as seeds for the source extraction algorithm [8].

### 296 **Detection of neuropil regions and neurons**

297 Although we can observe the whole central brain (though the access to the gnathal ganglia depending  
298 on the quality of the preparation), as well as a large part of the optic lobes (typically the lobula and most  
299 of the medulla), we cannot observe all of the fly neurons. In particular, the ventral cord in the fly thorax  
300 is not accessible with the current set up. Imaging the ventral nerve cord might be feasible with the  
301 appropriate dissection preparation and an objective with a larger field of view.

302 As the brain contains approximately  $\sim 10^5$  neurons, and we record, at most, a few hundreds of activity-  
303 related components, we are far from obtaining recordings from all neurons. This could be due to various  
304 reasons. First, some neurons might be silent and thus undetectable by our algorithm, which is based on

305 temporal changes. Second, a number of neurons might contribute to one component. Indeed, the  
306 resolution of the microscope is, in general, larger than individual somata and neurites are, and neurites  
307 with similar presynaptic inputs and thus similar activity patterns will likely have similar geometry,  
308 making them indistinguishable to the algorithm. Additionally, the low axial resolution far from the focal  
309 plane makes it difficult to sort out the activity from regions that are close to each other such as the  
310 antennal lobe and the lateral accessory lobe, or the protocerebral bridge and the antler. However close  
311 to the focal plane, the functional maps were the same scale as functional maps obtained with higher  
312 resolution microscopy techniques were (e.g., in the fan-shaped body [36] and the lateral horn [37],  
313 respectively), or regions known to be functional units (e.g., antennal lobe glomeruli and ellipsoid body  
314 wedges and tiles). This suggests that the light field resolution might not limit the detection of functional  
315 units in comparison to higher resolution techniques, at least close to the focal plane. Third, neurons can  
316 be connected via gap junctions, making their activity too similar to be separated into different  
317 components. Using a second color and complementary drivers (e.g., drivers for excitatory versus  
318 inhibitory neurons, or drivers for main neurotransmitters versus drivers for neuromodulatory neurons)  
319 could increase the number of components that can be detected. Fourth, the signal-to-noise ratio might  
320 be insufficient for PCA and ICA to detect the activity in some processes. To increase the signal-to-noise  
321 ratio and obtain more components, future researchers could use a more sensitive probe (albeit at lower  
322 temporal resolution with GCaMP6s for example), record longer time series, or use faster probes to  
323 obtain more temporal information. Finally, the dimensionality reduction carried out with PCA might  
324 result in a loss of information that could be captured using other dimensionality reduction techniques.

325 The identification of anatomical structures could also be improved. Currently, the registration of the  
326 maps with the anatomy is done using landmark registration. This method is imprecise in brain areas that  
327 lack clear landmarks such as the ventral areas. Concurrently imaging the brains using a different  
328 microscopy technique with higher resolution could help detect more landmarks or make it possible to

329 use different registration techniques. Automating the search for matches between the maps and  
330 neurons in large databases such as Flycircuit or Virtual Fly Brain would help to get to the level of neurons  
331 rather than brain regions.

332 The maps obtained using PCA and ICA can have regions with both positive and negative values, but this  
333 study has ignored the negative parts of the maps. More work is necessary to characterize the meaning  
334 of the negative values of the maps. In particular, neurons underlying the positive part of the maps could  
335 be inhibiting the neurons underlying the negative part of the map.

### 336 **Time series interpretation**

337 The PCA/ICA algorithm used here helps to unmix neural activity from movement artefacts, or from other  
338 overlapping but different processes as well as scattered activity coming from other parts of the brain  
339 (see Figs. S11, S12, S14 to S16, and S20). However, the interpretation of these time series is not  
340 straightforward as there is no guarantee that the algorithm will extract the full neural activity from one  
341 region. Furthermore, the imperfect spatial separation of the sources can lead to artefacts when strong  
342 synchronous fluorescence changes are present in large parts of the brain. For example, in Figure S14B, a  
343 negative signal is present for a component in the optic lobe after the odor is presented. As this decrease  
344 is not present when measuring fluorescence in the region of interest delimited by the z-scored maps, or  
345 when applying PCA and ICA in the region of the optic lobes only, it is likely due to an imperfect  
346 separation of the optic lobe components from the regions in the middle of the brain where fluorescence  
347 strongly changes in response to the odor. Indeed, the maps for the optic lobe components have small  
348 negative values in the mushroom body and antennal lobe areas. To recognize these artefacts, observing  
349 both the unmixed time series and the region of interest fluorescence is thus advisable, as done in Figs.  
350 S12 and S14 to S16. Using a different algorithm such as non-negative matrix factorization might help



351 prevent these artefacts, however, in our hands, the components obtained with non-negative matrix  
352 factorization were less localized, and thus more difficult to interpret than with PCA/ICA.

353 Movement correction with 3dvolreg can be imperfect and even can, in some cases, introduce additional  
354 artefacts when strong fluorescence changes are present in large parts of the brain. Furthermore, the  
355 algorithm uses rigid registration and does not correct for local deformations. Although we partly these  
356 artefacts at the PCA and ICA stages of the analysis, they can complicate the interpretation of some of  
357 the time series. Better movement correction methods with a limited sensitivity to fluorescence changes  
358 (such as RASL [7,38]) and non-rigid registration [39–41], as well as using an activity independent  
359 fluorophore in another color channel as a reference, would improve the reliability of the time series.

## 360 **Conclusion**

361 Despite these limitations, the methods presented in this study can be used as a functional screen to  
362 identify brain regions and neurons involved in processing any stimulus or behavior that a fly can perform  
363 under the microscope. Furthermore, complementary to screens using activation or silencing of specific  
364 neurons, the voxels, regions and component's time series give insight into the dynamics of the network,  
365 including ongoing spontaneous activity. This will help us understand how the brain accomplishes various  
366 functions, in particular those involving recurrent loops, such as integrating stimuli with various types of  
367 memory to guide behavior [24] and situating the animal in space [15,42].

368

## 369 **Methods**

### 370 **Fly rearing and preparation for imaging**

371 The fly genotype was as described in the figure legends, and fly stocks were obtained from the  
372 *Drosophila* Bloomington Stock Center, Bloomington, IN. Flies were reared at 25 °C with a 24 h light/dark  
373 cycle on brown food (containing cornmeal, molasses, yeast, soy flour, agar, proprionate and nipogen),  
374 which has lower auto-fluorescence than yellow food (such as the one from the Bloomington Stock  
375 Center which contains yellow cornmeal, malt extract, corn syrup, yeast, soy flour, agar and proprionic  
376 acid).

377 Fly holders were 3D printed using Supplementary data chamber.stl. A piece of tape (Scotch 3M 0.75"  
378 wide) was shaped as a 1 mm high step using a 1 mm thick glass slide, and an aperture as is shown in  
379 Supplementary Figure 1 (1mm wide for the body and 0.6 mm wide for the head) was made by hand  
380 using a sharpened scalpel or a thin lancet (36 gauge, from TiniBoy). The tape was then stuck onto the  
381 chamber, aligning the opening of the tape to the center of the holder. We added nail polish at the  
382 contact between the tape and the holder to avoid leaks. We also added black nail polish ("Black Onyx"  
383 nail laquer, OPI products) to the tape to block the excitation light from hitting the fly's eyes.

384 Note that although the black painted tape protected the flies' eyes from direct illumination by the  
385 microscope's excitation light, the light scattered by the brain can still activate the eye's receptors for  
386 blue light, as the transient activity in the first few seconds of each experiment demonstrates (see for  
387 example the optic lobe trace in Fig. S6). To verify that these receptors were not saturated we presented  
388 flashes of 470 nm blue light as external stimuli (See Fig. S27). Although the stimuli excited fluorophores  
389 non-specifically, PCA and ICA could still extract neuronal calcium responses in the optic lobes and the  
390 protocerebral bridge, thus demonstrating that the fly could still perceive external blue stimuli.

391 At the start of an experiment, flies were transferred to an empty glass vial and left on ice for  
392 approximately one minute. The holder was put in contact with wet tissues on ice under a  
393 stereomicroscope. A fly from the cold vial was pushed into the holder's opening so that the posterior  
394 part of the head was in contact with the tape. UV-curing glue (Fotoplast gel, from Dreve), was added at  
395 the junction between the tape and the head between the eyes and cured for 5 seconds using a 365 nm  
396 Thorlabs LED light at 20% of power for 5 seconds. A piece of thin copper wire (wire-magnet, 40 gauge,  
397 from AmplifiedParts) or a piece of tape was placed above the legs to push them away from the  
398 proboscis (see Fig. S1). UV glue was then added at the rim of the eye and all around the proboscis  
399 (which was pushed into the head), without touching the antenna or the legs, and was cured for 5  
400 seconds. Uncured glue was carefully removed with tissues. A small amount of vacuum grease was  
401 placed around the neck behind the proboscis to avoid later leaks. The wire or tape was then removed,  
402 and a small piece of tissue paper or a small Styrofoam ball was given to the fly to walk on to monitor its  
403 health during the following steps.

404 The holder was turned over and the fly's thorax was pushed down to clear the way to the back of the  
405 brain. Small pieces of tape were added onto any remaining holes around the fly's body, and UV glue was  
406 added on top of them and cured around the thorax to fix it in place. Vacuum grease was then pushed  
407 toward the neck with a tissue. Saline (108 mM NaCl, 5 mM KCl, 3 mM CaCl<sub>2</sub>, 4 mM MgCl<sub>2</sub>, 4 mM  
408 NaHCO<sub>3</sub>, 1 mM NaH<sub>2</sub>PO<sub>4</sub>, 5 mM trehalose, 10mM sucrose, 5 mM HEPES adjusted to pH 3.35 +/- 0.05  
409 with NaOH, prepared weekly) was added and left for few minutes to make sure that there were no  
410 leaks.

411 Fresh saline was added, and dissection was started with forceps (#5SF, from Dumont) that had been  
412 previously sharpened as finely as possible by hand. We first removed the cuticle in the middle of the  
413 back of the head, being careful to cut pieces before pulling them out. This exposed the hole in the  
414 middle of the brain where muscle 16 resides. The pulsatile piece was pulled out. Fresh saline was added,

415 and the remainder of the cuticle was removed piece by piece. The brain was washed with saline several  
416 times to remove fat bodies. The air sacs were then removed very carefully as to try not to displace the  
417 brain. After a new wash with saline, the fly was ready for imaging.

#### 418 **Imaging set up**

419 The microscope was modified from an upright Olympus BX51W with a 20x NA 1.0 XLUMPlanFL, or a 40x  
420 0.8 NA LUMPLFN objective (from Olympus). A microlens array with pitch=125 $\mu$ m and f/10 to match the  
421 20x objective, or f/25 to match the 40x objective [3] (from RPC Photonics), was positioned at the image  
422 plane using a custom made holder (with some parts from Bioimaging Solutions, Inc). Two relay lenses  
423 (50mm f/1.4 NIKKOR-S Auto, from Nikon) projected the image onto the sensor of a scientific CMOS  
424 camera (Hamamatsu ORCA-Flash 4.0). Note that when using half the camera frame to attain 200Hz for  
425 voltage recordings, the brain fit within in the field of view, but rays coming from points far from the  
426 focal plane with a large angle were missed, slightly impairing reconstruction. A 490nm LED (pE100  
427 CoolLED) at approximately 10% of its full power was used for excitation. We used a 482/25 bandpass  
428 filter, a 495 nm dichroic beam splitter, and a 520/35 bandpass emission filter (BrightLine, Semrock) for  
429 the fluorescence. We measured the power at the sample with a power meter and found that it was up  
430 to 1mW for the 40x objective and 4mW for the 20x objective. Photobleaching led to a decrease in  
431 intensity after 30 seconds of 13% (N=12, SD=9%) for GCaMP6, and 20% (N=6, SD=13%) for ArcLight.  
432 Note that the full set up cost approximately USD \$37000 ( USD \$52000 with the 64Gb of RAM  
433 acquisition computer and the 256Gb of RAM analysis computers), which was substantially cheaper than  
434 other cutting-edge microscopy techniques such as two-photon microscopes are.

435 The resolution as a function of depth (see Fig. S2) was determined by imaging 2  $\mu$ m fluorescent beads  
436 dispersed in an agarose gel. After reconstruction, the center of beads at different distances from the

437 focal plane were recorded using ImageJ, and a MATLAB program measured the point spread function's  
438 axial and lateral full-width at half-maximum (see <https://github.com/sophie63/FlyLFM> for the code).

439 The lateral field of view for the 20x objective was 624 x 636 square microns (312 x 309 for the 40x  
440 objective), as was determined using a mire.

441 The fly holder was positioned on a U-shaped stage above an air-supported ball so that the fly could walk  
442 (see Fig. 1 and supplementary videos). The ball was either polyurethane foam (10 mm in diameter),  
443 Styrofoam, or hollow HDPE (¼ inch). We prepared a cup matching the ball diameter and with a 1.2 mm  
444 hole using self-curing rubber (from Sugru). A bottle of compressed air provided a steady flow in a  
445 pipeline consisting of a tube and a pipette tip connected to the cup hole. A micromanipulator (from  
446 Narishige) positioned the ball under the fly's legs. For some flies, we instead provided a small Styrofoam  
447 ball that the fly could hold. The fly and the ball were illuminated by a row of IR LEDs (940nm, from  
448 RaspberryPiCafe®) in front of the fly, and were observed at 100 Hz using a small camera (FFMV-03M2M,  
449 from Point Grey).

450 To better align the behavior with the fluorescence, in some experiments the camera for monitoring the  
451 behavior and the fluorescence were synchronized by using the output of the Flash4.0 camera to trigger  
452 the acquisition from the behavior camera. When imaging the fluorescence at 200Hz, one triggering  
453 signal out of two was ignored by the slower behavior camera that recorded at 100Hz. We recorded the  
454 fluorescence images were recorded with HCLImage (from Hamamatsu) and streamed them to RAM on a  
455 64Gb of RAM computer, which allowed us to record approximately one continuous minute.

456 For the odor stimulus, air was delivered by a pump (ActiveAQUA AAPA7.8L) through an electrically  
457 controlled valve (12 Vdc normally closed solenoid valve, from American Science & Surplus), bubbled in  
458 50% ethanol or 50% apple cider vinegar in a vial, and blown towards the fly through an inverted 1 mL  
459 pipette tip. The valve circuit was controlled by a relay (RELAY TELECOM DPDT 2A 4.5V, Digi-Key), that

460 was connected to a LabJack U3-HV through a LJTICK-RelayDriver (from LabJack). For visual stimulation,  
461 the excitation light and a 365nm or 470nm LED (from Thorlabs), were also triggered by the LabJack,  
462 which was controlled using MATLAB programs (see <https://github.com/sophie63/FlyLFM> for the code).

### 463 **Analysis**

464 We reconstructed the light field images were reconstructed using a program in Python as described in  
465 ref. [3]. Briefly, a point spread function library corresponding to the specific set up was first generated:  
466 we typically chose to reconstruct a stack of 40 layers (separated by 6 microns), with a lateral sampling  
467 distance of either 3 or 6 microns. The voltage probe's low signal-to-noise ratio made it more difficult to  
468 detect signals with a finer sampling, so we typically reconstructed the voltage data with a lateral  
469 sampling distance of 6 microns and the calcium data with a lateral sampling of 3 microns. We  
470 reconstructed the images using 3D deconvolution on a cluster of GPUs (generously provided by the  
471 Qualcomm Institute at UCSD). Note that reconstruction using cloud computing (AWS) would cost  
472 ~\$0.003 dollars per volume. A dataset of 10000 time steps required approximately eight hours to  
473 reconstruct on a cluster of 15 GPUs.

474 We assembled the images in a Nifti file using a python routine (Tiff2niiV2 in  
475 <https://github.com/sophie63/FlyLFM>), inspected and cropped them in FIJI, and discarded the first 5  
476 seconds because the strong activity in response to the excitation light made it difficult to correct for  
477 movement and photobleaching. The 3D image registration function 3dvolreg [43] from AFNI was then  
478 used to correct for rigid movements. We removed the background fluorescence and the decrease in  
479 intensity from photobleaching by subtracting a signal smoothed using a box average over 15 to 30  
480 seconds depending on the severity of the bleaching and the length of the recording. The time series  
481 were then multiplied by -1 for ArcLight data. For denoising, we found that a Kalman filter (from  
482 <https://www.mathworks.com/matlabcentral/fileexchange/26334-kalman-filter-for-noisy-movies>) with a

483 gain of 0.5 was better than a median filter over 3 points was, and we used this for the figures in this  
484 paper. We then applied SVD to subtract components that were most clearly related to movement: their  
485 maps contained shadows around areas with different background intensities as shown in Fig S4. For  
486 some flies, different conditions corresponded to different datasets, which we concatenated in time after  
487 preprocessing. The reconstructed data as well as the data after preprocessing will be soon available on  
488 the CRCNS website ([https://crcns.org/NWB/Data\\_sets](https://crcns.org/NWB/Data_sets)).

489 For early datasets (before direct synchronization of the cameras), the fluorescence and the behavior  
490 were aligned using the onset and offset of the excitation light. The small discrepancy (approximately 30  
491 ms per minute) between the total time given by the camera for the fluorescence and the camera for the  
492 behavior was corrected linearly, then the fluorescence data was interpolated to match the behavior  
493 data using the MATLAB function Interpolate2vid (in the cases for which the cameras were not  
494 synchronized).

495 We manually analyzed the behavior (noting the times of the behaviors, or pressing different keyboard  
496 keys when we recognized different behavior using the MATLAB GUI Video\_Annotate in  
497 <https://github.com/sophie63/FlyLFM>). We also characterized the fly's walk by tracking the movements  
498 of the ball using ImageJ's optic flow plugin (Gaussian Window MSE).

499 Maps comparing the activity during rest and walking, resting and grooming, turning left and turning  
500 right, and one second after stimulus presentation compared to one second before were obtained by  
501 simply averaging the time series in each voxel for the different conditions, and subtracting these maps  
502 from one another. The positive value was colored in magenta and the negative in green thus showing  
503 which condition dominated in which voxel.

504 The average of the volume time series was aligned to an anatomical template (available here:  
505 <https://github.com/VirtualFlyBrain/DrosAdultBRAINdomains>) in which the brain is segmented into

506 regions according to the nomenclature described in ref. [14]. The registration was performed using  
507 landmarks with ImageJ (as described in [http://imagej.net/Name\\_Landmarks\\_and\\_Register](http://imagej.net/Name_Landmarks_and_Register)). We marked  
508 several points in the protocerebral bridge, the tips of the mushroom body (between the alpha and  
509 alpha' lobes), the middle of the noduli, the lateral tip of the lateral triangles, the lateral tip of the lateral  
510 horns, the center of the ellipsoid body, the center of the antennal lobes, and the bottom part of the  
511 trachea at the level of the noduli. Although the landmarks were readily observable with the background  
512 fluorescence (see Fig S3 for example), making a template superposing the components to the volume  
513 average helped to visually find the landmarks.

514 Dimensionality was then reduced by separating the volumes into slices of thickness corresponding to  
515 the point spread function height, and averaging in z for each slice. The 4D datasets were typically  
516  $(x,y,z,t)=200 \times 100 \times 10 \times 10000$  at this stage.

517 For source extraction, we found that using melodic [12] from the FSL package directly gave meaningful  
518 components. However as the code was running slowly on our large datasets, so we adapted it in  
519 MATLAB to parallelize some steps. A first step of SVD was used to remove the largest part of the  
520 components before calculating the variance that was used to normalize the data. We then reapplied  
521 SVD and plotted the log of the singular value spectrum to automatically detect the shoulder at the point  
522 with a 45° tangent. We found that although the components with the smallest variance were noise,  
523 some activity-related components were still present after the shoulder point. As such, choosing twice  
524 the number of components at the shoulder gave a good compromise between keeping activity and  
525 removing noise components. ICA was then applied with FastICA [44] (see ICAamelodic.m file from  
526 <https://github.com/sophie63/FlyLFM>). The sign was chosen so that the average of the positive side of  
527 the map was larger than the negative side. The components were then automatically sorted by brain  
528 region: we averaged the components maps in anatomically defined regions[14] using regions masks, and  
529 chose the main region as the one with the highest average. We removed components corresponding to



530 movement or noise partly automatically (removing components present in more than 5 regions and  
531 containing more than 200 separate objects) and partly by hand (see example of typical artifactual  
532 components in Fig. S11) using a Jupyter notebook (the notebooks corresponding to the choices made for  
533 the figures in this paper can be found at <https://github.com/sophie63/FlyLFM>).

534 To obtain the region of interest time series, we first made masks using the PCA/ICA maps. We calculated  
535 the standard deviation from the value in the map, and set all voxels with values inferior to 3 times that  
536 std to zero. We then used those mask to do a weighted average of the  $\Delta F/F$  time series.

537 The time series for turning left or right were obtained by convolving the optic flow for the ball going left  
538 or right, with a kernel corresponding to the impulse response of GCaMP6. These time series were then  
539 regressed with the components' time series, and we inspected the maps with the strongest regression  
540 coefficients.

#### 541 **Image manipulations**

542 The Fig. 1B bar was added with ImageJ and the 3D rendering was done in Icy [45], in which transparency  
543 and contrast were adjusted globally on the volume. The component's maps were thresholded at  $3 \times \sigma$ ,  
544 and only the positive part of the map was displayed. The image contrast was then globally adjusted in  
545 ImageJ, and the figures panels were assembled in Inkscape.

#### 546 **Code availability**

547 The MATLAB and Python code for preprocessing, PCA/ICA and sorting of the components is available at  
548 <https://github.com/sophie63/FlyLFM>.

549

## 550 Author Contributions

551 R. Greenspan and T. Katsuki had the idea of using light field microscopy to image the whole fly  
552 brain. T. Sejnowski proposed to use PCA and ICA to extract activity from the recordings. T. Jia performed  
553 data analysis and curation. L. Grosenick, M. Broxton and K. Deisseroth provided advice and training on  
554 the light field microscopy setup, the code for 3D deconvolution, and a computational infrastructure for  
555 deconvolving large numbers of volumes. R. Greenspan and T. Sejnowski supervised the  
556 research. T. Katsuki performed early experiments and advised S. Aimon throughout the project. S.  
557 Aimon designed and performed the experiments presented in this paper, did most of the analysis,  
558 and wrote the manuscript. All the authors critically reviewed the manuscript.

559

560 **Acknowledgements**

561 We thank Jürgen Schulze, Joseph Keefe and Calit2 for generously providing a GPU cluster. Charles F.  
562 Stevens contributed many helpful discussions and comments on this manuscript. Angelique Paulk  
563 provided valuable advice on the floating ball setup. Stephen M. Smith helped with reproducing parts of  
564 melodic in MATLAB, Ryan Shultzaberger helped with R and bash, Daniel Soudry helped with source  
565 extraction, and Nicolas Aimon helped with fitting time series in python. Alexander Pope helped with fly  
566 preparation. M. Nitabach and V. Pieribone gave us UAS-ArcLight flies and the Nitabach laboratory  
567 provided technical support on imaging ArcLight.

568

569

- 570 1. Tomer R, Lovett-Barron M, Kauvar I, Andalman A, Burns VM, Sankaran S, et al. SPED Light Sheet  
571 Microscopy: Fast Mapping of Biological System Structure and Function. *Cell*. Cell Press; 2015;163:  
572 1796–1806.
- 573 2. Lemon WC, Pulver SR, Hockendorf B, McDole K, Branson K, Freeman J, et al. Whole-central  
574 nervous system functional imaging in larval *Drosophila*. *Nat Commun*. Nature Publishing Group, a  
575 division of Macmillan Publishers Limited. All Rights Reserved.; 2015;6. Available:  
576 <http://dx.doi.org/10.1038/ncomms8924>
- 577 3. Broxton M, Grosenick L, Yang S, Cohen N, Andalman A, Deisseroth K, et al. Wave optics theory  
578 and 3-D deconvolution for the light field microscope. *Opt Express*. 2013;21: 25418–39.  
579 doi:10.1364/OE.21.025418
- 580 4. Prevedel R, Yoon Y-G, Hoffmann M, Pak N, Wetzstein G, Kato S, et al. Simultaneous whole-animal  
581 3D imaging of neuronal activity using light-field microscopy. *Nat Methods*. 2014;11: 727–30.  
582 doi:10.1038/nmeth.2964
- 583 5. Levoy M, Ng R, Adams A, Footer M, Horowitz M. Light field microscopy. *ACM Trans Graph*.  
584 2006;25: 924. doi:10.1145/1141911.1141976
- 585 6. Grosenick L, Anderson T, Smith SJ. Elastic Source Selection for in vivo imaging of neuronal  
586 ensembles. *Proceedings IEEE International Symposium on Biomedical Imaging: From nano to*  
587 *macro*. 2009. pp. 6–9. doi:10.1109/ISBI.2009.5193292
- 588 7. Grosenick L, Broxton M, Kim CK, Liston C, Poole B, Yang S, et al. Identification Of Cellular-Activity  
589 Dynamics Across Large Tissue Volumes In The Mammalian Brain. *bioRxiv*. 2017; Available:  
590 <http://biorxiv.org/content/early/2017/05/01/132688.abstract>
- 591 8. Nöbauer T, Skocek O, Pernía-Andrade AJ, Weilguny L, Martínez Traub F, Molodtsov MI, et al.  
592 Video rate volumetric Ca<sup>2+</sup> imaging across cortex using seeded iterative demixing (SID)

- 593 microscopy. *Nat Methods*. 2017;14: 811–818. doi:10.1038/nmeth.4341
- 594 9. Cong L, Wang Z, Chai Y, Hang W, Shang C, Yang W, et al. Rapid whole brain imaging of neural  
595 activity in freely behaving larval zebrafish (*Danio rerio*). *Elife*. 2017;6. doi:10.7554/eLife.28158
- 596 10. Chen T-W, Wardill TJ, Sun Y, Pulver SR, Renninger SL, Baohan A, et al. Ultrasensitive fluorescent  
597 proteins for imaging neuronal activity. *Nature*. 2013;499: 295–300. doi:10.1038/nature12354
- 598 11. Jin L, Han Z, Platasa J, Wooltorton JRA, Cohen LB, Pieribone VA. Single Action Potentials and  
599 Subthreshold Electrical Events Imaged in Neurons with a Fluorescent Protein Voltage Probe.  
600 *Neuron*. Elsevier Inc.; 2012;75: 779–785. doi:10.1016/j.neuron.2012.06.040
- 601 12. Beckmann CF, Smith SM. Probabilistic independent component analysis for functional magnetic  
602 resonance imaging. *IEEE Trans Med Imaging*. 2004;23: 137–52. doi:10.1109/TMI.2003.822821
- 603 13. Mukamel EA, Nimmerjahn A, Schnitzer MJ. Automated analysis of cellular signals from large-scale  
604 calcium imaging data. *Neuron*. Elsevier Ltd; 2009;63: 747–760. Available:  
605 <http://www.ncbi.nlm.nih.gov/pubmed/19778505>
- 606 14. Ito K, Shinomiya K, Ito M, Armstrong JD, Boyan G, Hartenstein V, et al. A systematic  
607 nomenclature for the insect brain. *Neuron*. 2014;81: 755–765. doi:10.1016/j.neuron.2013.12.017
- 608 15. Lin CY, Chuang CC, Hua TE, Chen CC, Dickson BJ, Greenspan RJ, et al. A Comprehensive Wiring  
609 Diagram of the Protocerebral Bridge for Visual Information Processing in the *Drosophila* Brain.  
610 *Cell Rep*. 2013;3: 1739–1753. doi:10.1016/j.celrep.2013.04.022
- 611 16. Chiang A-S, Lin C-Y, Chuang C-C, Chang H-M, Hsieh C-H, Yeh C-W, et al. Three-dimensional  
612 reconstruction of brain-wide wiring networks in *Drosophila* at single-cell resolution. *Curr Biol*.  
613 Elsevier Ltd; 2011;21: 1–11. doi:10.1016/j.cub.2010.11.056
- 614 17. Milyaev N, Osumi-sutherland D, Reeve S, Burton N, Baldock R a., Armstrong JD. The virtual fly

- 615 brain browser and query interface. *Bioinformatics*. 2012;28: 411–415.  
616 doi:10.1093/bioinformatics/btr677
- 617 18. Wolff T, Iyer NA, Rubin GM. Neuroarchitecture and neuroanatomy of the *Drosophila* central  
618 complex: A GAL4-based dissection of protocerebral bridge neurons and circuits. *J Comp Neurol*.  
619 2015;523: 997–1037. doi:10.1002/cne.23705
- 620 19. Behnia R, Clark DA, Carter AG, Clandinin TR, Desplan C. Processing properties of ON and OFF  
621 pathways for *Drosophila* motion detection. *Nature*. 2014;512: 427–30. doi:10.1038/nature13427
- 622 20. Wilson RI. Early olfactory processing in *Drosophila*: mechanisms and principles. *Annu Rev*  
623 *Neurosci*. 2013;36: 217–41. doi:10.1146/annurev-neuro-062111-150533
- 624 21. Kazama H, Wilson RI. Origins of correlated activity in an olfactory circuit. *Nat Neurosci*. 2009;12:  
625 1136–1144. doi:10.1038/nn.2376
- 626 22. Hsu CT, Bhandawat V. Organization of descending neurons in *Drosophila melanogaster*. *Sci Rep*.  
627 2016;6: 20259. doi:10.1038/srep20259
- 628 23. Suver MP, Huda A, Iwasaki N, Safarik S, Dickinson MH. An Array of Descending Visual  
629 Interneurons Encoding Self-Motion in *Drosophila*. *J Neurosci*. 2016;36. Available:  
630 <http://www.jneurosci.org/content/36/46/11768.long>
- 631 24. Aso Y, Hattori D, Yu Y, Johnston RM, Iyer NA, Ngo T-TT, et al. The neuronal architecture of the  
632 mushroom body provides a logic for associative learning. *Elife*. 2014;3: 1–48.  
633 doi:10.7554/eLife.04577
- 634 25. Mann K, Gallen CL, Clandinin TR. Whole-Brain Calcium Imaging Reveals an Intrinsic Functional  
635 Network in *Drosophila*. *Curr Biol*. 2017;27: 2389–2396.e4. doi:10.1016/j.cub.2017.06.076
- 636 26. Lu R, Sun W, Liang Y, Kerlin A, Bierfeld J, Seelig JD, et al. Video-rate volumetric functional imaging

- 637 of the brain at synaptic resolution. *Nat Neurosci.* 2017;20: 620–628. doi:10.1038/nn.4516
- 638 27. Li W, Voleti V, Schaffer E, Vaadia R, Grueber WB, Richard S, et al. SCAPE Microscopy for High  
639 Speed , 3D Whole-Brain Imaging in *Drosophila Melanogaster*. 2016;2016: 4–6.
- 640 28. Robie AA, Hirokawa J, Edwards AW, Simpson JH, Reiser MB, Branson K, et al. Mapping the Neural  
641 Substrates of Behavior Resource Mapping the Neural Substrates of Behavior. *Cell.* Elsevier Inc.;  
642 2017;170: 393–406.e28. doi:10.1016/j.cell.2017.06.032
- 643 29. Chiappe ME, Seelig JD, Reiser MB, Jayaraman V. Walking modulates speed sensitivity in  
644 *drosophila* motion vision. *Curr Biol.* 2010;20: 1470–1475. doi:10.1016/j.cub.2010.06.072
- 645 30. Buchanan SM, Kain JS, de Bivort BL. Neuronal control of locomotor handedness in *Drosophila*.  
646 *Proc Natl Acad Sci U S A.* 2015;112: 6700–5. Available:  
647 <http://www.pnas.org/content/112/21/6700.abstract>
- 648 31. Namiki S, Iwabuchi S, Pansopha Kono P, Kanzaki R. Information flow through neural circuits for  
649 pheromone orientation. *Nat Commun.* 2014;5: 5919. doi:10.1038/ncomms6919
- 650 32. Yang HHH, St-Pierre F, Sun X, Ding X, Lin MZZ, Clandinin TRR. Subcellular Imaging of Voltage and  
651 Calcium Signals Reveals Neural Processing In Vivo. *Cell.* 2016;166: 245–257.  
652 doi:10.1016/j.cell.2016.05.031
- 653 33. Gong Y, Huang C, Li JZ, Grewe BF, Zhang Y, Eismann S, et al. High-speed recording of neural spikes  
654 in awake mice and flies with a fluorescent voltage sensor. *Science.* 2015;350: 1361–6.  
655 doi:10.1126/science.aab0810
- 656 34. Cao G, Platisa J, Pieribone VA, Raccuglia D, Kunst M, Nitabach MN. Genetically targeted optical  
657 electrophysiology in intact neural circuits. *Cell.* 2013;154: 904–913.  
658 doi:10.1016/j.cell.2013.07.027

- 659 35. Gouwens NW, Wilson RI. Signal propagation in *Drosophila* central neurons. *J Neurosci*. 2009;29:  
660 6239–49. doi:10.1523/JNEUROSCI.0764-09.2009
- 661 36. Weir PT, Dickinson MH. Functional divisions for visual processing in the central brain of flying  
662 *Drosophila*. *Proc Natl Acad Sci U S A*. 2015;112: E5523-32. doi:10.1073/pnas.1514415112
- 663 37. Strutz A, Soelter J, Baschwitz A, Farhan A, Grabe V, Rybak J, et al. Decoding odor quality and  
664 intensity in the *Drosophila* brain. *Elife*. 2014;3: e04147. doi:10.7554/eLife.04147
- 665 38. Peng Y, Ganesh A, Wright J, Xu W, Ma Y. RASL: Robust alignment by sparse and low-rank  
666 decomposition for linearly correlated images. 2010 IEEE Computer Society Conference on  
667 Computer Vision and Pattern Recognition. 2010. pp. 763–770. doi:10.1109/CVPR.2010.5540138
- 668 39. Kim DH, Kim J, Marques JC, Grama A, Hildebrand DGC, Gu W, et al. Pan-neuronal calcium imaging  
669 with cellular resolution in freely swimming zebrafish. *Nat Methods*. 2017;14: 1107–1114.  
670 doi:10.1038/nmeth.4429
- 671 40. Nguyen JP, Shipley FB, Linder AN, Plummer GS, Liu M, Setru SU, et al. Whole-brain calcium  
672 imaging with cellular resolution in freely behaving *Caenorhabditis elegans*. *Proc Natl Acad Sci U S*  
673 *A*. 2015; 33. doi:10.1073/pnas.1507110112
- 674 41. Pnevmatikakis EA, Giovannucci A. NoRMCorre: An online algorithm for piecewise rigid motion  
675 correction of calcium imaging data. *J Neurosci Methods*. 2017;291: 83–94.  
676 doi:10.1016/j.jneumeth.2017.07.031
- 677 42. Seelig JD, Jayaraman V. Neural dynamics for landmark orientation and angular path integration.  
678 *Nature*. 2015;521: 186–191. doi:10.1038/nature14446
- 679 43. Cox RW, Jesmanowicz a. Real-time 3D image registration for functional MRI. *Magn Reson Med*.  
680 1999;42: 1014–1018. doi:10.1002/(sici)1522-2594(199912)42:6<1014::aid-mrm4>3.0.co;2-f



- 681 44. Hyvärinen A. Fast and robust fixed-point algorithms for independent component analysis. IEEE  
682 Trans Neural Netw. 1999;10: 626–34. doi:10.1109/72.761722
- 683 45. de Chaumont F, Dallongeville S, Chenouard N, Hervé N, Pop S, Provoost T, et al. Icy: an open  
684 bioimage informatics platform for extended reproducible research. Nat Methods. 2012;9: 690–6.  
685 doi:10.1038/nmeth.2075
- 686
- 687

688 Figure 1: Imaging the brain of adult behaving flies using light field microscopy. A) Experimental set-up.  
689 The fly is head-fixed and its tarsi are touching a ball. The light from the brain's fluorescence goes  
690 through the objective, the microscope tube lens, a microlens array, and relay lenses, onto the sensor of  
691 a high-speed sCMOS camera. Another camera in front of the fly records its behavior. B) Example of a  
692 light field deconvolution (fly's genotype: *nsyb-Gal4, UAS-ArcLight*). Top: 2D light field image acquired in  
693 5ms—one camera acquisition period—with a 20x NA 1.0 objective. Bottom: Anterior and posterior  
694 views (slightly tilted sideways) of the computationally reconstructed volume. 3D bar is 90x30x30  
695 microns. See also Figs. S1, S2, and S3.

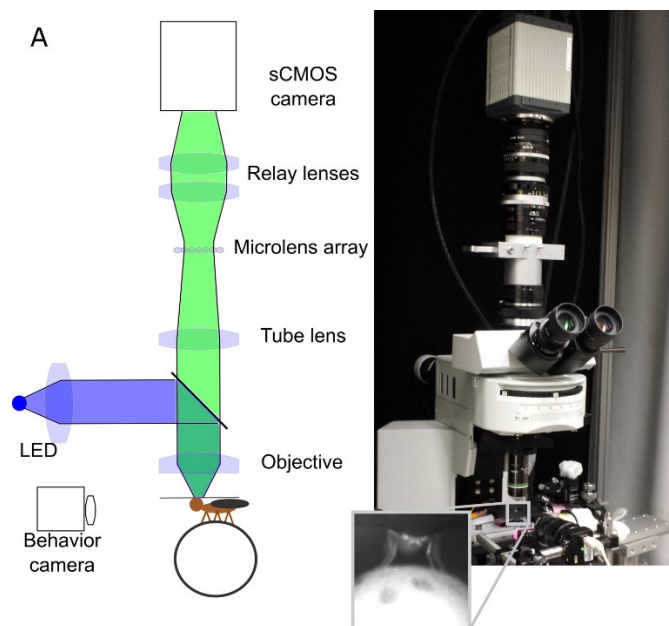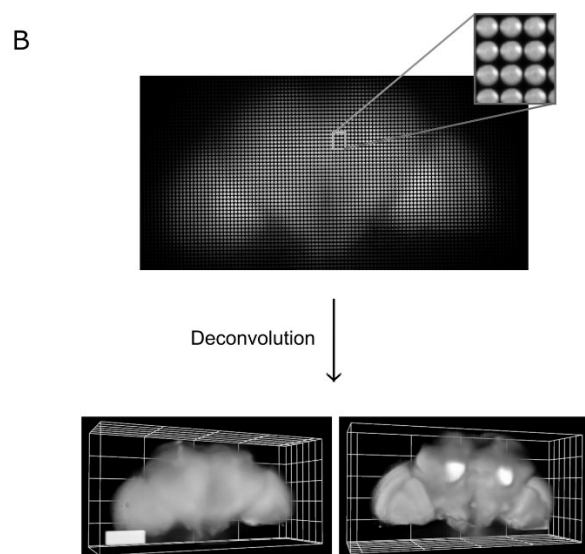

696

697

698

699

700

701 Figure 2: Near-whole brain activity maps for various conditions. A) Comparison of fluorescence intensity  
702 when the fly rests and when it is active (either walking or grooming). The pixel value is green if the  
703 fluorescence is higher during the behavior, and magenta if the fluorescence is higher during rest. The  
704 arrows point to regions active during grooming that were reproducible from fly to fly. Both flies  
705 expressed GCaMP6f. The pan-neuronal driver was nsyb-Gal4 and the dopamine driver was TH-Gal4.  
706 Note that there is an angle (39 degrees for the pan-neuronal and 20 degrees for the dopamine neurons)  
707 between the Z-axis and the anterior/posterior axis. B) Comparison of fluorescence intensity when the fly  
708 turns left or right. The arrows point to regions symmetrical and reproducible from fly to fly. The fly's  
709 genotype was nsyb-Gal4 and UAS-GCaMP6f. Note that there is a 40 degrees angle between the Z-axis  
710 and the anterior-posterior axis. The pixel value is green if the fluorescence is higher during turning left,  
711 magenta if the fluorescence is higher during turning right. C) Comparison of fluorescence increase  
712 during the response to stimuli for odor (magenta), and light (green). The fly's genotype was Cha-Gal4,  
713 GMR57C10-Gal4, and UAS-GCaMP6f. Note that the brain is tilted 19 degrees along the lateral axis. See  
714 also Figs. S4–8.

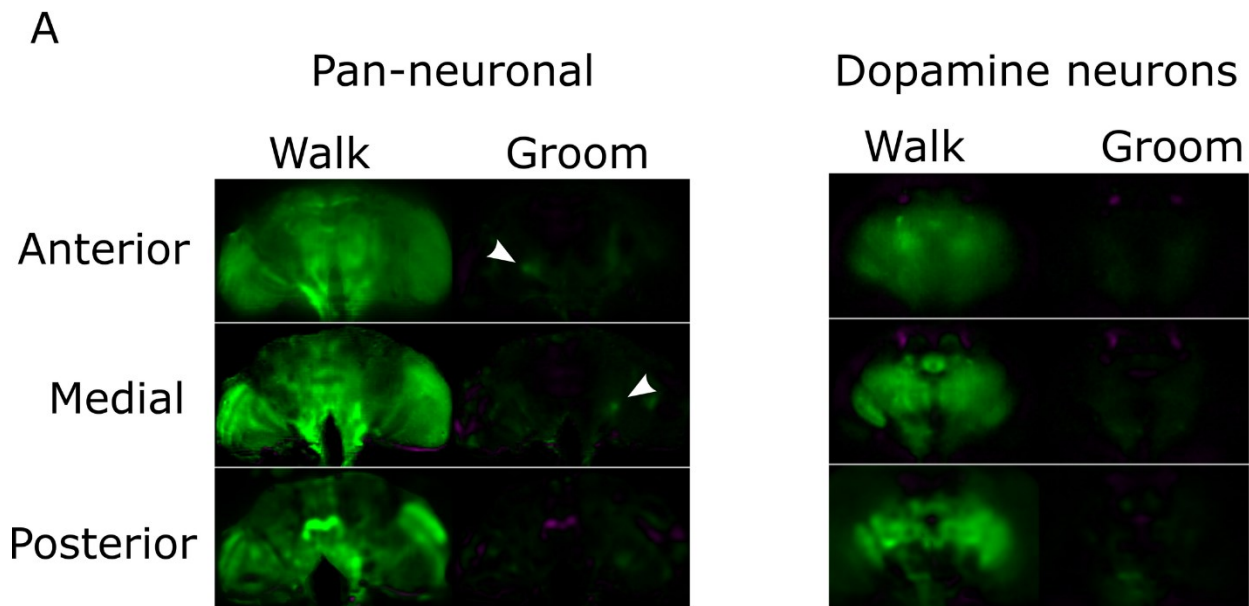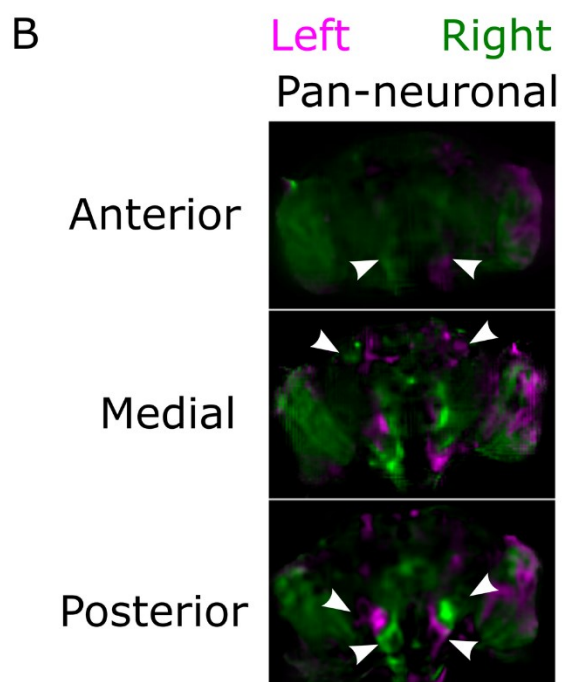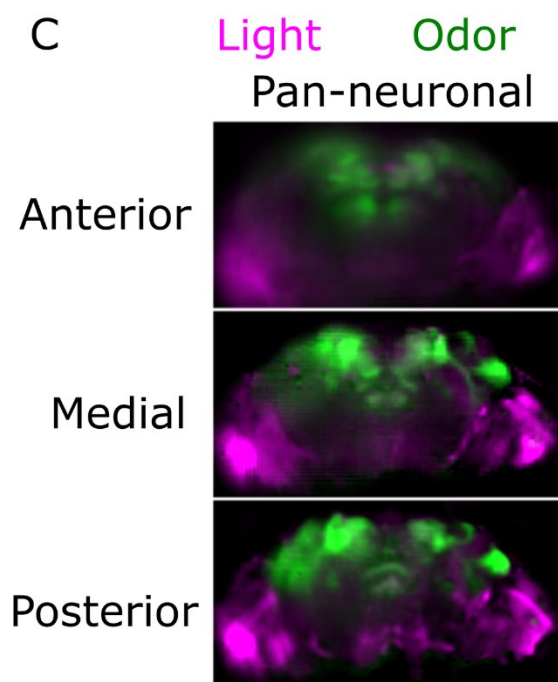

715

716

717

718 Fig. 3: Z-stack slices of the 3D map for all the components extracted using PCA/ICA. The maps from  
719 calcium activity (GCaMP6f) are compared with the maps obtained with a control independent of activity  
720 (GFP). Different colors correspond to different components, which were assigned randomly. Note that  
721 the slice depth is larger when it is farther from the middle of the brain (see Methods section). See Figs.  
722 S9 and S10 for maps aligned to an anatomical template, and see S11 for examples of individual  
723 artefactual components.

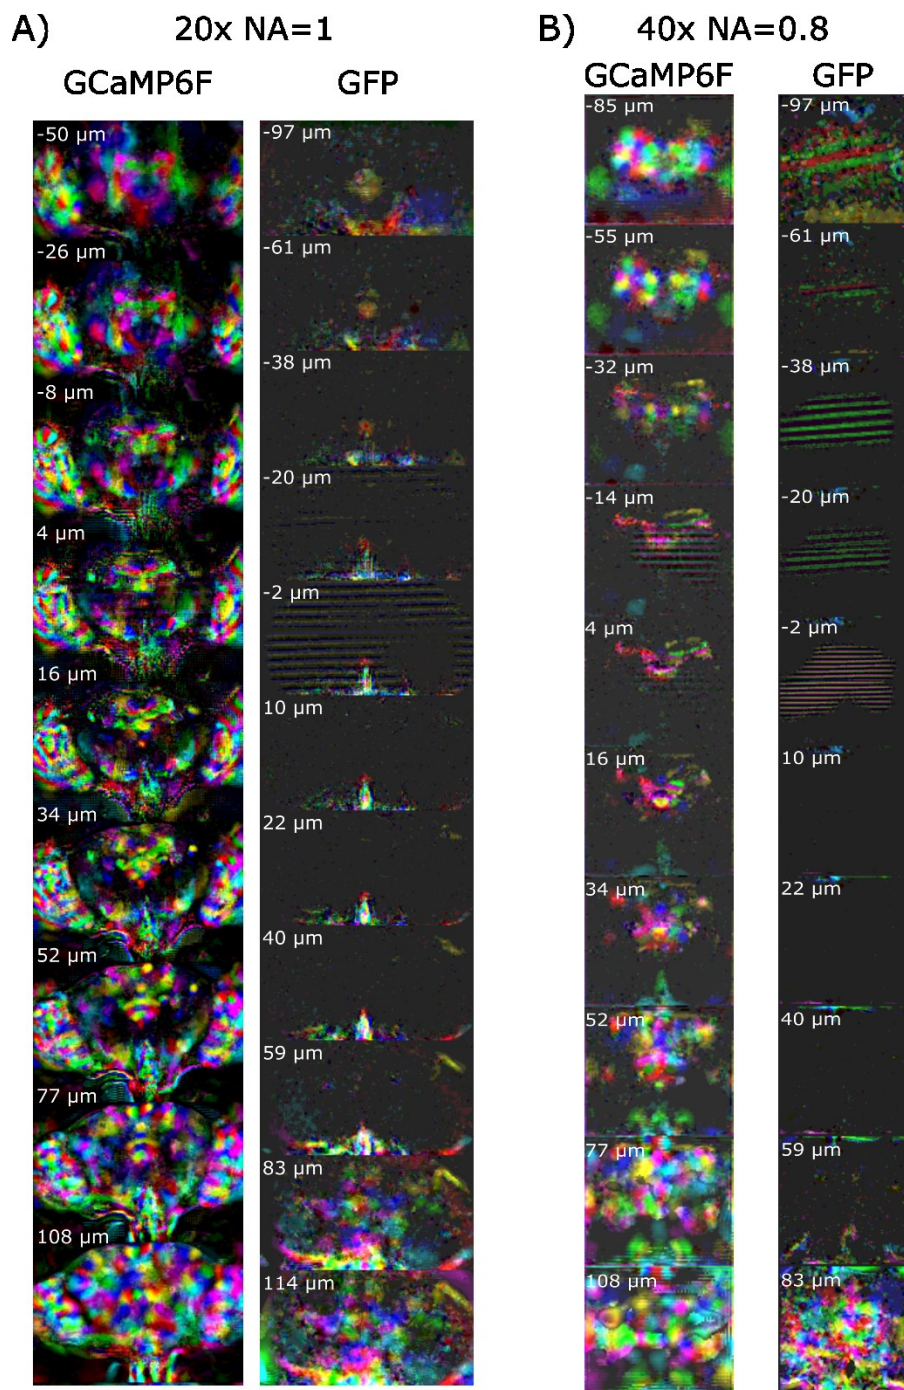

724

725 Figure 4: A) Components automatically sorted by regions containing the highest average in the map, and  
726 projected along the z-axis. Note that this sorting algorithm could be inaccurate in the case of maps  
727 containing small parts of large regions and noise in very small regions (i.e., the bulb or gall). B)  
728 Comparison between functional and anatomical maps. Left: functional maps from a pan-neuronal  
729 (GMR57C10-Gal4 and Cha-Gal4) GCaMP6f experiment. Right: corresponding anatomical structures. The  
730 top three images correspond to central complex structures—modified from Cell Reports, Vol. 3, Lin, C. Y.  
731 et al., “A Comprehensive Wiring Diagram of the Protocerebral Bridge for Visual Information Processing  
732 in the *Drosophila* Brain.,” 1739-1753, Copyright 2013, with permission from Elsevier, and the four  
733 bottom images were neurons from the Virtual Fly Brain database. The brain for the functional data is  
734 tilted 19 degrees along the lateral axis compared to the template presented on the right. Note that the  
735 functional maps in the fan-shaped body and the lateral horn are the same scale as functional maps  
736 obtained with higher resolution microscopy techniques ([36] and [37], respectively). See also Figs. S11  
737 through S15 for considerations regarding the associated time series.



A)

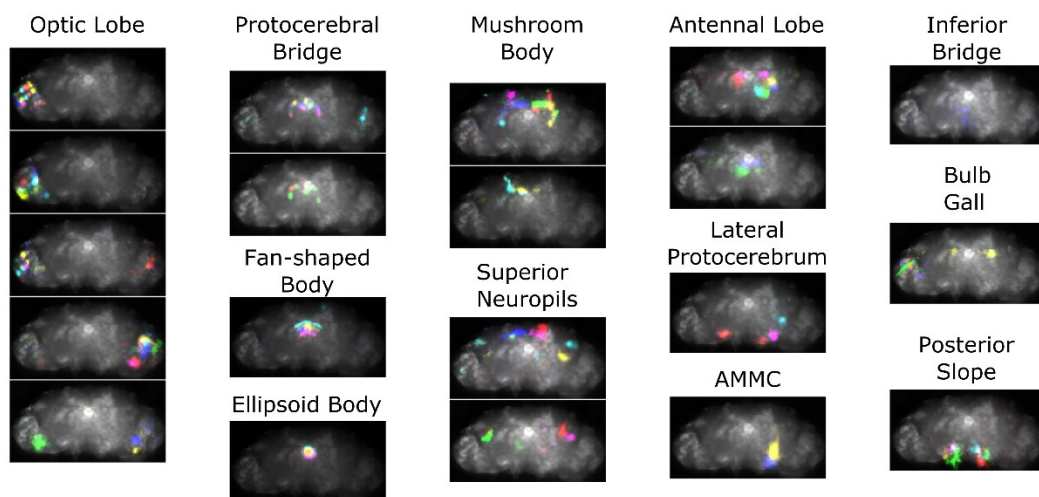

B)

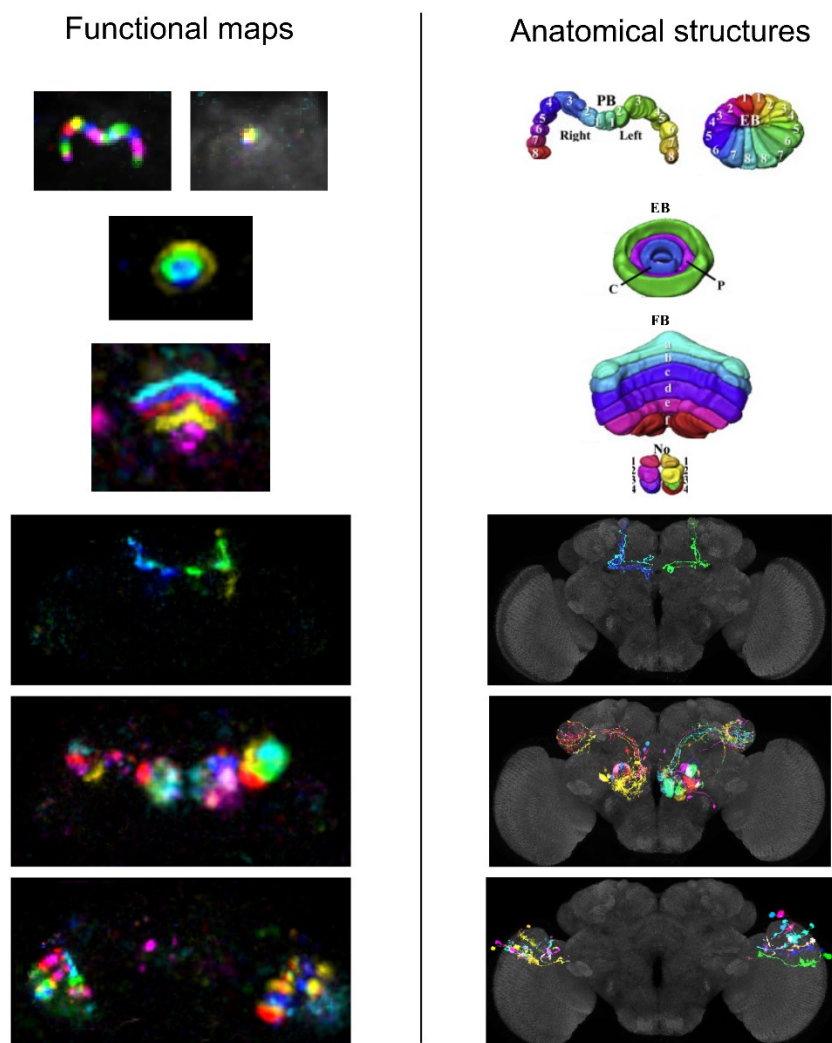

738

739

740 Figure 5: Z-stacks of components among the 3 to 6 most correlated to turning left (cyan and blue) or  
741 right (red and yellow). Each color corresponds to one component. Flies expressed GCaMP6 pan-  
742 neuronally. A) Anterior, medial and posterior views in the original configuration. B) The same  
743 components aligned to an anatomical template's z-stack. See also Fig. S16.

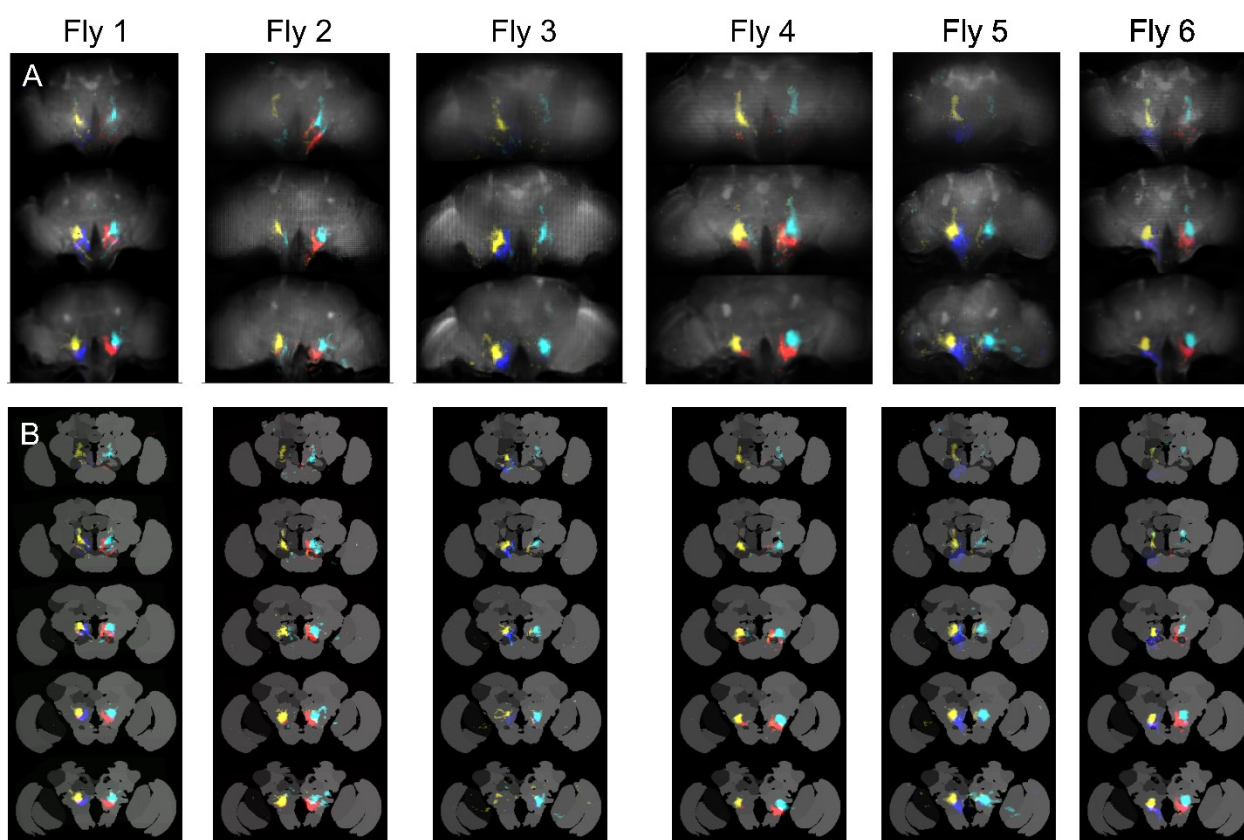

744

745

746 Fig. 6: Components from flies expressing GCaMP6f in dopamine neurons (TH-Gal4 driver). A) All activity-  
747 related components are presented and sorted by brain region, with the color of the time series (which  
748 are variance-normalized) on the left, matching the color of the maps on the right (e.g., the first image  
749 corresponds to the first trace, the second image to the next three traces, and so on). Note that most  
750 components are strongly correlated with the fly walking (forest green traces interleaved with the  
751 component traces). The fly was resting or grooming the rest of the time. B) Example of TH-positive  
752 neuron from the Virtual Fly Brain database (right) matching the components' maps (left). Note that the  
753 brain is tilted 20 degrees along the lateral axis compared to the template presented on the right. (See  
754 also Fig. S17).

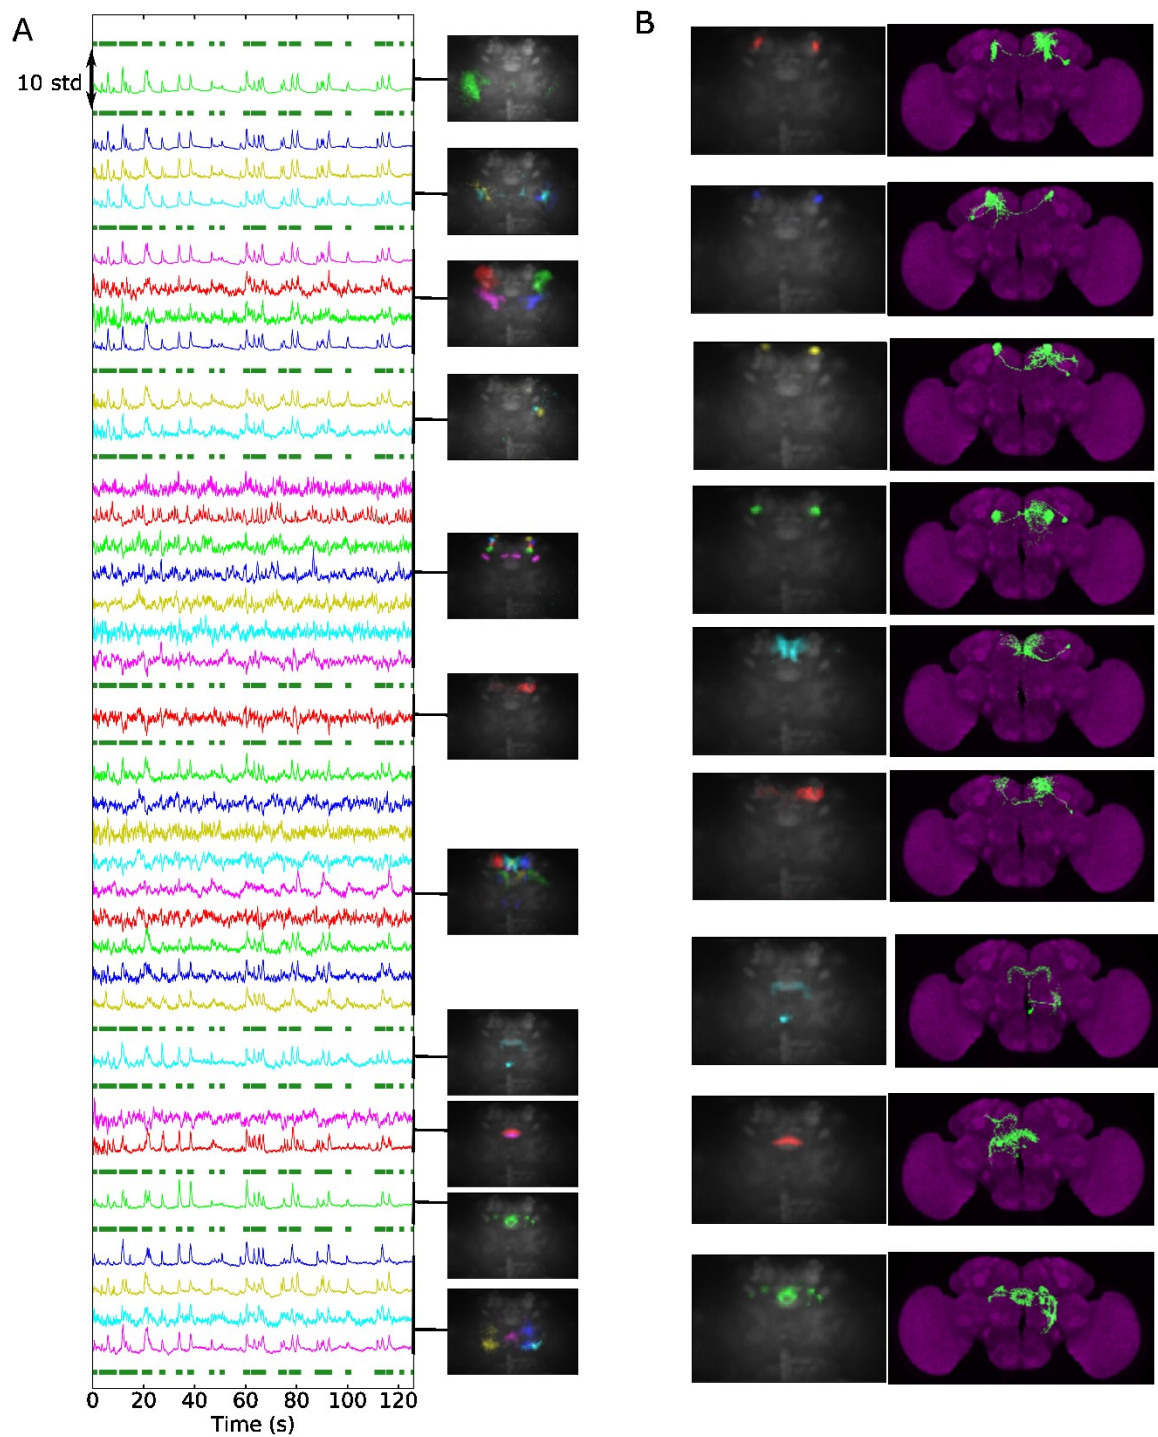

757 Figure 7: Components extracted from voltage activity. ArcLight was expressed pan-neuronally (nsyb-  
758 GAL4). The fly was presented with periodic flashes of UV light (violet bars) and puffs of apple cider  
759 vinegar (pink bars). The component time series are shown on the left (variance normalized), and the  
760 corresponding maps are on the right (PB: protocerebral bridge, FB: fan-shaped body), sorted by the  
761 brain region that was majorly present in the map. Note that the coronal plane was tilted 37 degrees  
762 away from the horizontal plane for this fly. See also Figs. S18 through S22.

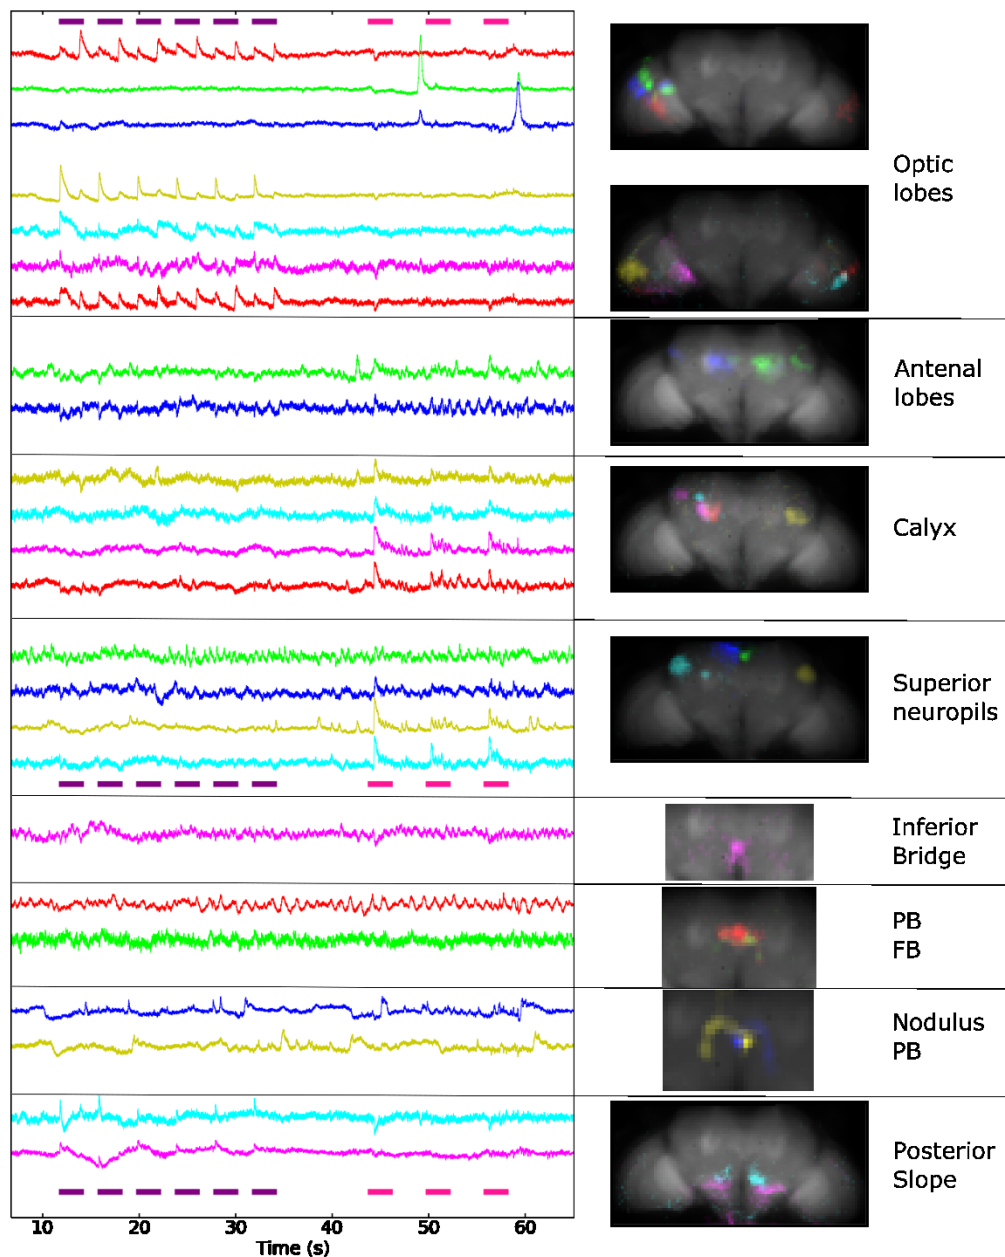

763

764

765 Figure 8: A) Spontaneous switches between up and down activity states for components in  
766 a nodulus and the contralateral part of the protocerebral bridge. We detected these components in all  
767 four flies studied (genotype: UAS\_ArcLight, and from top to bottom: nsyb-Gal4, nsyb-Gal4, Cha-Gal4 and  
768 GMR57C10-Gal4, nsyb-Gal4). The images on the right present the two components at two different Z  
769 planes (at the level of the noduli and fan-shaped body, and at the level of the protocerebral bridge). B)  
770 Control in which GFP was expressed pan-neuronally. Because no similar components were automatically  
771 extracted, we created masks of one nodulus and the opposite side of the protocerebral bridge using an  
772 anatomical template.

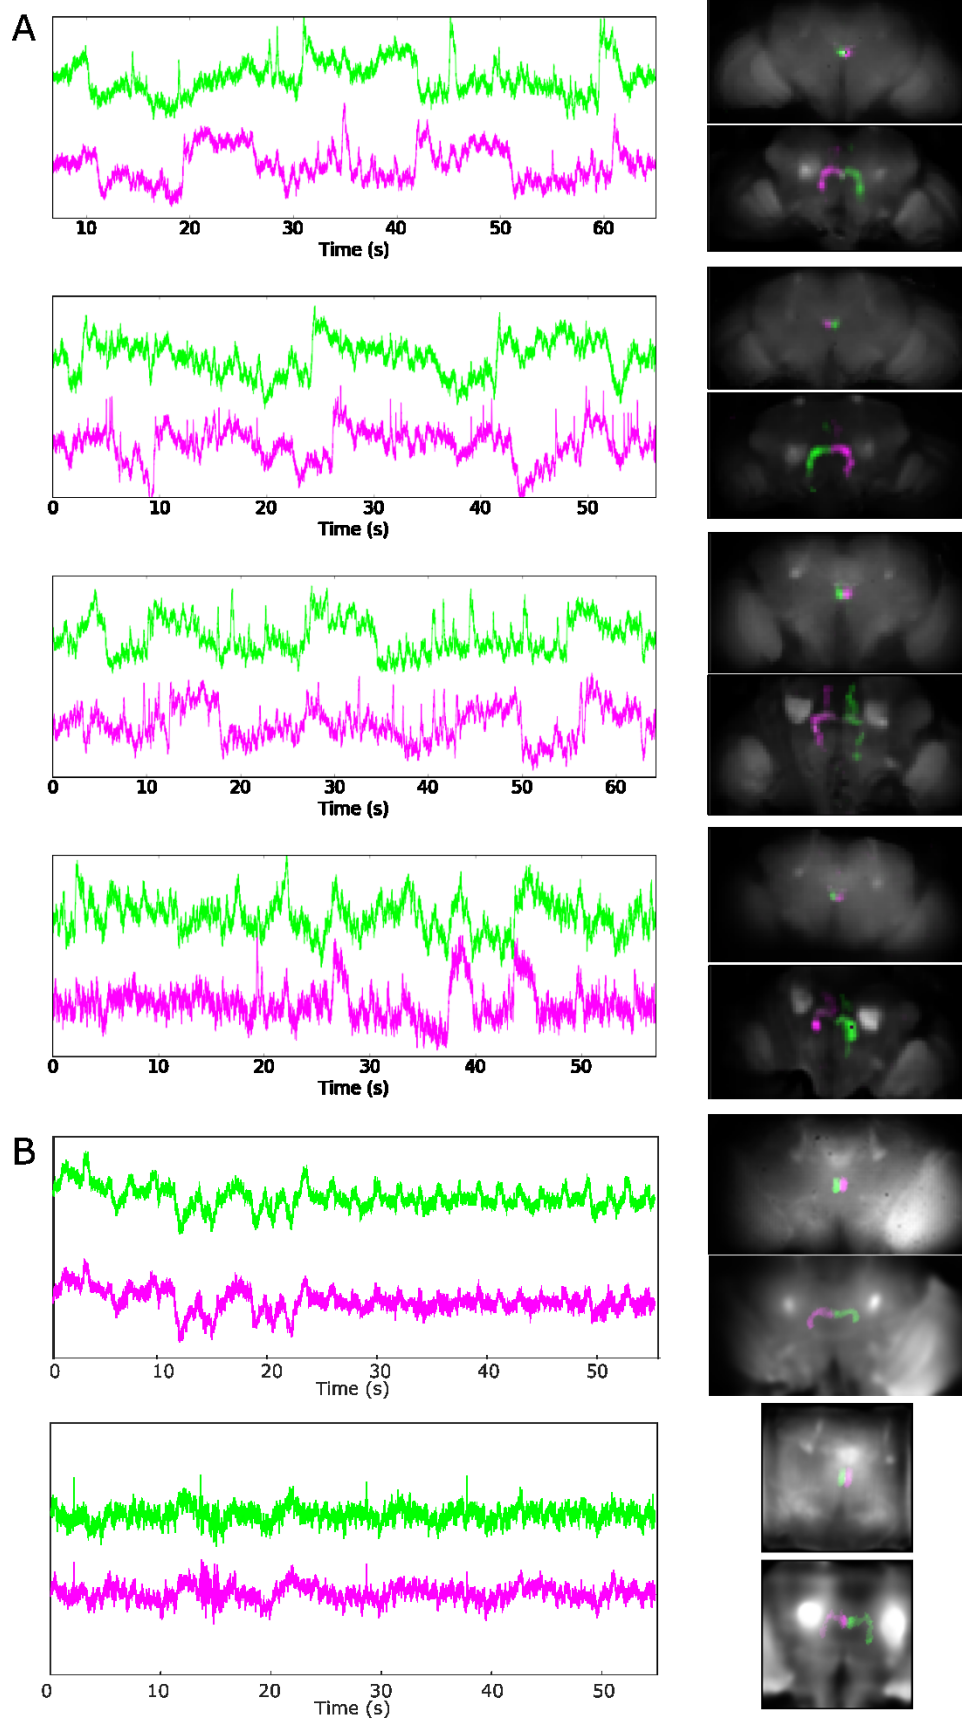

Source: http://biorxiv.org/content/10.1101/033803v4.full.pdf
